# Supplementary material
Source: Elsevier journal article supplement (https://www.sciencedirect.com/science/article/pii/S2173572717300620)
Supplement: mmc1 [file S2173572717300620:mmc1.docx]

Material Suplementario:

Datos descriptivos:

Tabla 1, Características de los Centros y pacientes,

| Hospitales | Número de camas del hospital | Número de camas de la UCI | Número de pacientes reclutados | Número de pacientes críticos | Número de pacientes estables |
| --- | --- | --- | --- | --- | --- |
| Bellvitge | 906 | 34 | 54 | 49 | 5 |
| Broggi | 270 | 18 | 10 | 10 | 0 |
| Clínic | 819 | 45 | 21 | 21 | 0 |
| Germans Trias i Pujol | 650 | 30 | 18 | 18 | 0 |
| General | 400 | 17 | 2 | 2 | 0 |
| Granollers | 300 | 10 | 5 | 5 | 0 |
| Hospitalet | 220 | 11 | 5 | 5 | 0 |
| Joan XXIII | 346 | 14 | 9 | 1 | 8 |
| Lleida | 450 | 18 | 18 | 18 | 0 |
| Manresa | 450 | 14 | 2 | 2 | 0 |
| Mar | 400 | 20 | 5 | 5 | 0 |
| Mataró | 324 | 10 | 2 | 2 | 0 |
| Mútua de Terrassa | 420 | 12 | 17 | 17 | 0 |
| Palamós♯ | 100 | 0 | 1 | 0 | 1 |
| Parc Taulí | 450 | 30 | 31 | 17 | 14 |
| Puigvert♯ | 137 | 0 | 19 | 0 | 19 |
| Reus | 310 | 22 | 10 | 10 | 0 |
| Sagrat Cor | 210 | 10 | 7 | 7 | 0 |
| Sant Pau | 644 | 22 | 16 | 16 | 0 |
| Tortosa | 250 | 11 | 5 | 5 | 0 |
| Trueta | 425 | 18 | 23 | 17 | 6 |
| Valle Hebron | 1146 | 40 | 31 | 31 | 0 |
| Vic | 300 | 10 | 5 | 3 | 2 |

♯ Hospitals without ICU: RRT was applied for AKI in stable patients,

Tabla 2. Descriptiva.

| Hospitales | n | Edad (años) | Género masculino (%) | Contexto de Sepsis (%) | Contexto Multifactorial (± sepsis) (%) |
| --- | --- | --- | --- | --- | --- |
| Bellvitge | 54 | 62 | 59 | 24,5 | 41 |
| Broggi | 10 | 62 | 60 | 12,5 | 37,5 |
| Clínic | 21 | 62 | 62 | 14,3 | 57 |
| Germans Trias | 18 | 64 | 78 | 67 | 33 |
| General | 2 | 76 | 50 | 50 | 0 |
| Granollers | 5 | 55 | 80 | 40 | 60 |
| Hospitalet | 5 | 74 | 60 | 40 | 60 |
| Joan XXIII | 9 | 78 | 100 | 0 | 100 |
| Lleida | 18 | 57 | 72 | 61,11 | 33,3 |
| Manresa | 2 | 77 | 100 | 50 | 50 |
| Mar | 5 | 52 | 60 | 20 | 60 |
| Mataró | 2 | 64,5 | 100 | 50 | 50 |
| Mútua Terrassa | 17 | 65 | 55 | 0 | 64 |
| Palamós | 1 | 71 | 100 | 0 | 0 |
| Parc Taulí | 31 | 68 | 71,4 | 35,7 | 28,6 |
| Puigvert | 19 | 67,8 | 52,6 | 0 | 31,6 |
| Reus | 10 | 63 | 90 | 20 | 30 |
| Sagrat Cor | 7 | 83 | 28,6 | 42,8 | 28,6 |
| Sant Pau | 16 | 67 | 69 | 56,25 | 31,25 |
| Tortosa | 5 | 72 | 100 | 80 | 0 |
| Trueta | 23 | 57 | 70 | 47 | 35,3 |
| Valle Hebron | 31 | 62 | 61,3 | 29 | 51,6 |
| Vic | 5 | 70 | 33,33 | 33,33 | 33,33 |

Tabla 3. Cifras de creatinina plasmática y recuperación de la función renal.

| Hospitales | n | Creatininab (mg/dL) | Creatinine0 (mg/dL) | Creatinine1 (mg/dL) | Recuperación de la función renal (%) |
| --- | --- | --- | --- | --- | --- |
| Bellvitge | 54 | 1,14 | 2,54 | 3,47 | 83,3 |
| Broggi | 10 | 1,38 | 2,68 | 4,13 | 100 |
| Clínic | 21 | 1,37 | 3,7 | 4,7 | 83,3 |
| Germans Trias | 18 | 1,2 | 3 | 3,6 | 100 |
| General | 2 | 1,1 | 1,9 | 2,95 | NA |
| Granollers | 5 | 0,9 | 2,32 | 2,46 | 75 |
| Hospitalet | 5 | 1,06 | 1,8 | 2,64 | 100 |
| Joan XXIII | 9 | 0,8 | 1,32 | 1,36 | 100 |
| Lleida | 18 | 1,07 | 2,23 | 2,35 | 75 |
| Manresa | 2 | 1,1 | 1,8 | 3,5 | NA |
| Mar | 5 | 0,87 | 1,5 | 2,8 | 100 |
| Mataró | 2 | 1,4 | 2,15 | 3,2 | NA |
| Mútua Terrassa | 17 | 2,1 | 3,72 | 3,75 | 71,4 |
| Palamós | 1 | 0,98 | 9 | 7,4 | 100 |
| Parc Taulí | 31 | 1,07 | 1,72 | 2,8 | 87,8 |
| Puigvert | 19 | 2,26 | 4,89 | 6,08 | 50 |
| Reus | 10 | 1,25 | 2,96 | 3,6 | 100 |
| Sagrat Cor | 7 | 1,01 | 1,55 | 2,73 | 100 |
| Sant Pau | 16 | 2,5 | 4,1 | 4,7 | 60 |
| Tortosa | 5 | 1,06 | 1,88 | 3,24 | 100 |
| Trueta | 23 | 0,85 | 3,5 | 4,26 | 71,4 |
| Valle Hebron | 31 | 1,34 | 2,7 | 3,04 | 33 |
| Vic | 5 | 1,27 | 2,32 | 3,43 | 100 |

NA: No aplicable; Creatininab: Creatinina basal; Creatinina0: Creatinina al ingreso; Creatinine1: Creatinine al inicio de la TRR; Recuperación de la función renal: Cifra de creatinina plasmática inferior a 1,5 mg/dL en ausencia de TRR al alta hospitalaria en los supervivientes.

Tabla 4. Escalas de gravedad y mortalidad.

| Hospitales | n | ISI | Charlson | SOFA0 | SOFA1 | Mortalidad (%) |
| --- | --- | --- | --- | --- | --- | --- |
| Bellvitge | 54 | 0,8 | 2,84 | 6,1 | 9,3 | 51 |
| Broggi | 10 | 0,58 | 2,63 | 3,38 | 4,25 | 25 |
| Clínic | 21 | 0,55 | 3,6 | 7,14 | 9 | 47,6 |
| Germans Trias | 18 | 0,7 | 3,8 | 12 | 12 | 72 |
| General | 2 | 0,55 | 1,5 | 2,5 | 11 | 100 |
| Granollers | 5 | 0,79 | 2,4 | 10,8 | 12 | 20 |
| Hospitalet | 5 | 0,62 | 2,2 | 8,5 | 10 | 40 |
| Joan XXIII | 9 | 0,63 | 3 | 5 | 4 | 0 |
| Lleida | 18 | 0,67 | 2,5 | 9,3 | 11,5 | 55,5 |
| Manresa | 2 | 0,62 | 4 | 6,5 | 9 | 100 |
| Mar | 5 | ? | 3 | 7,6 | 13,8 | 80 |
| Mataró | 2 | 0,75 | 1,5 | 4,5 | 11 | 100 |
| Mútua Terrassa | 17 | ? | 2,9 | 4,5 | 4,4 | 36,4 |
| Palamós | 1 | 0,19 | 4 | NA | NA | 0 |
| Parc Taulí | 31 | 0,65 | 3,07 | 4,9 | 7,2 | 42,8 |
| Puigvert | 19 | 0,29 | 3,5 | NA | NA | 26,3 |
| Reus | 10 | 0,48 | 2,4 | 6,9 | 8,6 | 30 |
| Sagrat Cor | 7 | 0,69 | 2 | 6,4 | 9,8 | 71,4 |
| Sant Pau | 16 | 0,56 | 5 | 8,8 | 9,3 | 68,75 |
| Tortosa | 5 | 0,68 | 2,4 | 9,2 | 9,6 | 60 |
| Trueta | 23 | ? | 1,76 | 10,3 | 10,1 | 58,8 |
| Valle Hebron | 31 | 0,67 | 2,32 | 8,1 | 11,7 | 71,43 |
| Vic | 5 | 0,7 | 1,33 | 10,3 | 11,3 | 66,66 |

NA: No aplicable; SOFA0: SOFA al ingreso en UCI; SOFA1: SOFA al inicio de la TRR; Charlson: Escala de comorbilidades de Charlson.

Tabla 5. Datos de la TRR y acceso vascular.

| Hospitales | n | TRRC (%) | TRRC&TRRI (%) | HDFVVC (%) | Dosis de TRRC (mL/Kg/h) | Acceso vascular femoral (%) |
| --- | --- | --- | --- | --- | --- | --- |
| Bellvitge | 54 | 100 | 20,4 | 70 | 35,4 | 100 |
| Broggi | 10 | 100 | 50% | 100 | NA | 62,5 |
| Clínic | 21 | 71,4 | 33,33 | 95,2 | 29,6 | 71,4 |
| Germans Trias | 18 | 100 | 27,8 | 89 | 34,7 | 94 |
| General | 2 | 100 | 0 | 100 | 34 | 100 |
| Granollers | 5 | 100 | 60 | 80 | 29,6 | 100 |
| Hospitalet | 5 | 100 | 0 | 100 | 35,8 | 100 |
| Joan XXIII | 9 | 100 | 0 | 100 | 35 | 100 |
| Lleida | 18 | 100 | 11,11 | 100 | 28,8 | 100 |
| Manresa | 2 | 100 | 50 | 100 | 35 | 100 |
| Mar | 5 | 100 | 0 | 100 | 32,8 | 100 |
| Mataró | 2 | 100 | 0 | 100 | 33 | 100 |
| Mútua Terrassa | 17 | 100 | 27,27 | 0 | 25,6 | 54,5 |
| Palamós | 1 | NA | NA | NA | NA | 100 |
| Parc Taulí | 31 | 50 | 0 | 100 | 33,4 | 64,3 |
| Puigvert | 19 | NA | NA | NA | NA | 58 |
| Reus | 10 | 100 | 0 | 80 | 38,65 | 80 |
| Sagrat Cor | 7 | 100 | 0 | 100 | 32 | 100 |
| Sant Pau | 16 | 100 | 37,5 | 100 | 30,75 | 87,5 |
| Tortosa | 5 | 100 | 20 | 100 | 30,6 | 40 |
| Trueta | 23 | 100 | 17,64 | 100 | 27,5 | 70,6 |
| Valle Hebron | 31 | 87,1 | 25,8 | 100 | 38,7 | 93,55 |
| Vic | 5 | 100 | 33,33 | 100 | 34,66 | 100 |

NA: No aplicable; TRRC: Terapia continua de Remplazo Renal; TRRI: Terapia de remplazo renal intermitente; HDFVVC: Hemodiafiltración veno-venosa continua; Dosis de TRRC: Dosis prescrita de la terapia continua.

Tabla 6. Tiempos en relación a la TRR.

| Hospitales | n | Días de TRR | Días hasta TRR | UCI-LOS | Planta-LOS |
| --- | --- | --- | --- | --- | --- |
| Bellvitge | 54 | 4 | 1 | 9 | 18,5 |
| Broggi | 10 | 9 | 5,4 | 19 | 10 |
| Clínic | 21 | 4 | 2 | 9 | 14 |
| Germans Trias | 18 | 5 | 1 | 14 | 18 |
| General | 2 | 1 | 4,5 | 11 | 0 |
| Granollers | 5 | 5 | 1 | 11 | 10,5 |
| Hospitalet | 5 | 3 | 6 | 20 | 9 |
| Joan XXIII | 9 | 17 | 1 | 136 | 26 |
| Lleida | 18 | 9 | 0 | 15 | 13 |
| Manresa | 2 | 7 | 5,5 | 20 | 0 |
| Mar | 5 | 8 | 2 | 15 | 16 |
| Mataró | 2 | 7 | 11 | 18 | 0 |
| Mútua Terrassa | 17 | 10 | 2 | 15 | 16 |
| Palamós | 1 | NA | 26 | NA | 65 |
| Parc Taulí | 31 | 2 | 2 | 15 | 28 |
| Puigvert | 19 | NA | 22 | NA | 37,5 |
| Reus | 10 | 3 | 0 | 6 | 8 |
| Sagrat Cor | 7 | 5 | 2 | 10 | 8,5 |
| Sant Pau | 16 | 2 | 0 | 7 | 11 |
| Tortosa | 5 | 7 | 1 | 19 | 30 |
| Trueta | 23 | 4 | 1 | 8 | 14 |
| Valle Hebron | 31 | 5,5 | 3 | 26 | 14 |
| Vic | 5 | 4 | 1 | 13 | 11,5 |

NA: No aplicable; Días de TRR: Duración de la TRR en días; Días hasta TRR: Tiempo transcurrido desde el momento del ingreso hasta el inicio de la TRR; UCI-LOS: Tiempo de estancia en la UCI; Planta-LOS: Tiempo de estancia en planta.
