# Supplementary material
Source: Elsevier journal article supplement (https://www.sciencedirect.com/science/article/pii/S2173572717300620)
Supplement: mmc2 [file S2173572717300620:mmc2.docx]

Material suplementario:

Se estudian los pacientes sin insuficiencia renal previa y se analiza su pronóstico en función del estadio de AKIN/KDIGO en que se encuentran en el momento de iniciar la terapia de remplazo renal (TRR):

Figura 1. No se hallan diferencias estadísticamente significativas en la supervivencia a los 90 días de los pacientes sin insuficiencia renal previa que en el momento de iniciar la TRR se encuentran en distintos estadíos de AKIN/KDIGO.

Figura 2. No se hallan diferencias estadísticamente significativas en la recuperación de la función renal al alta hospitalaria de los pacientes sin insuficiencia renal previa que en el momento de iniciar la TRR se encuentran en distintos estadíos de AKIN/KDIGO.

Figura 3. Los pacientes sin insuficiencia renal previa que ingresan oligúricos sobreviven menos a los 90 días que los que no ingresan oligúricos. P-valor de 0,014; RR 3,1; IC 95% 1,3-7,7.

Se estudian por separado los pacientes sin insuficiencia renal previa que no ingresan oligúricos y se analiza su pronóstico:

Figura 4. La supervivencia a los 90 días de los pacientes sin insuficiencia renal previa que no ingresan oligúricos es del 80%.

Se estudian los pacientes sin insuficiencia renal previa que no están oligúricos en el momento del ingreso y se analiza su pronóstico en función del estadio de AKIN/KDIGO en que se encuentran en el momento de iniciar la terapia de remplazo renal (TRR):

Figura 5. Los pacientes sin insuficiencia renal previa que no están oligúricos en el momento del ingreso no tienen un pronóstico significativamente diferente en función del estadio de AKIN/KDIGO en que se encuentran en el momento de iniciar la terapia de remplazo renal (TRR).

Se estudian por separado los pacientes sin insuficiencia renal previa que ingresan oligúricos y se analiza su pronóstico:

Figura 6. La supervivencia a los 90 días de los pacientes sin insuficiencia renal previa que ingresan oligúricos es del 44,76%.

Se estudian los pacientes sin insuficiencia renal previa que están oligúricos en el momento del ingreso y se analiza su pronóstico en función del estadio de AKIN/KDIGO en que se encuentran en el momento de iniciar la terapia de remplazo renal (TRR):

Figura 7. Los pacientes sin insuficiencia renal previa que están oligúricos en el momento del ingreso no tienen un pronóstico significativamente diferente en función del estadio de AKIN/KDIGO en que se encuentran en el momento de iniciar la terapia de remplazo renal (TRR).
